# Supplementary material
Source: publisher figshare collection journal article supplement (https://acs.figshare.com/ndownloader/files/4508554)
Supplement: Supplementary file 1 [file 4508554]

## Supplementary Material

### The Identity of the Nucleophile Substitution may Influence Metal Interactions with the Cleavage Site of the Minimal Hammerhead Ribozyme

Edith M. Osborne, W. Luke Ward, Max Z. Ruehle, and Victoria J. DeRose

Department of Chemistry, University of Oregon, Eugene, OR 97403-1253

#### Table of Contents

|                                                                                                                                                    |        |
|----------------------------------------------------------------------------------------------------------------------------------------------------|--------|
| Fig. S1. Activity of the mHHRz with a C17 2'-NH <sub>2</sub> substitution                                                                          | p. 2   |
| Fig. S2. Cd <sup>2+</sup> -dependent <sup>31</sup> P NMR spectra of <sup>am</sup> U <sub>PS</sub> U diastereomers                                  | p. 3   |
| Fig. S3. Fit of Cd <sup>2+</sup> -dependent <sup>am</sup> U <sub>PS</sub> U <sup>31</sup> P NMR spectra                                            | p. 4   |
| Fig. S4. Cd <sup>2+</sup> -dependent <sup>31</sup> P NMR spectra of 2'-NH <sub>2</sub> /PS sites in RNA helices                                    | p. 5-6 |
| Fig. S5. Activity of the mHHRz with a U16.1 2'-NH <sub>2</sub> /PS substitution                                                                    | p. 7   |
| Fig. S6. <sup>1</sup> H- <sup>31</sup> P COSY spectra of <sup>am</sup> U <sub>PS</sub> U diastereomers in presence and absence of Cd <sup>2+</sup> | p. 8-9 |
| Fig. S7. DQF-COSY spectra of <sup>am</sup> U <sub>PS</sub> U diastereomers in presence and absence of Cd <sup>2+</sup>                             | p. 10  |

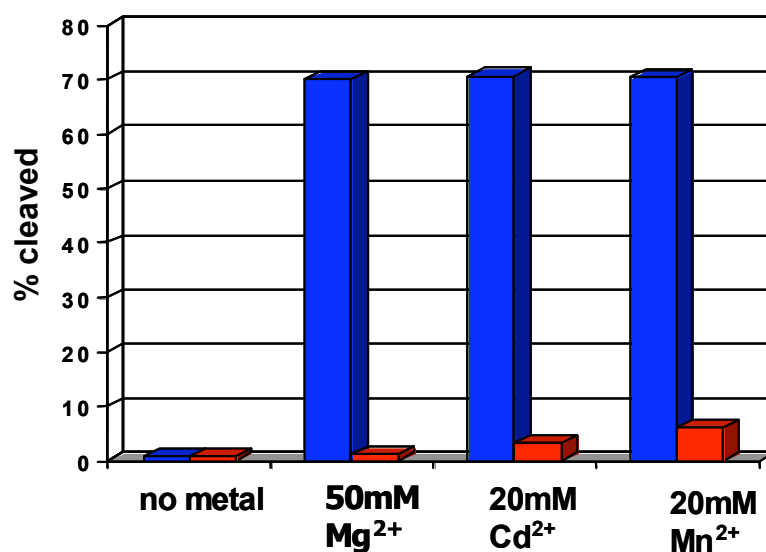

Figure S1. Activity of the mHHRz with a nucleophile C17 (cleavage site) 2'-NH<sub>2</sub> substitution in comparison with WT. Data are plotted as % cleaved substrate following incubation for discrete time periods. WT HHRz (in blue) were incubated for 1 hr and C17 2'-NH<sub>2</sub>-substituted HHRz (in red) were incubated for 36 hours. Reaction conditions: 5 mM Hepes pH 8.5, 100 mM NaCl, 24 °C, and indicated concentrations of divalent cations (as Cl<sup>-</sup> salts).

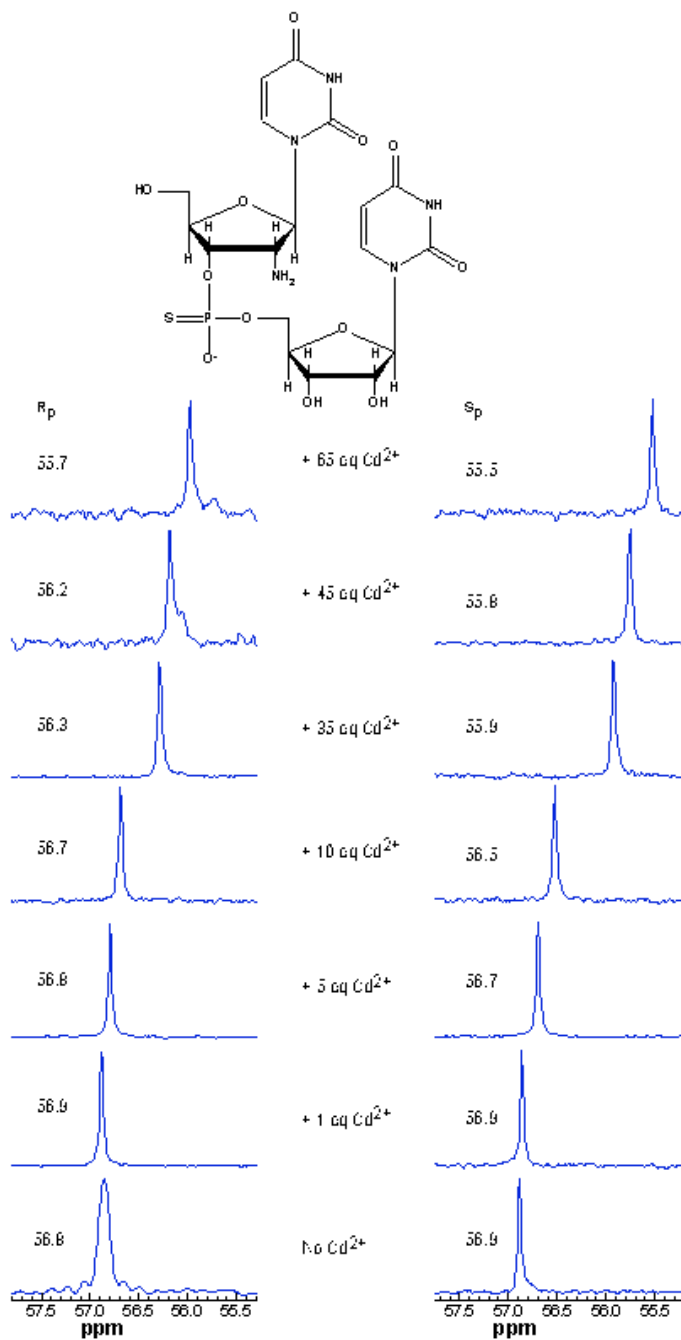

Figure S2.  $\text{Cd}^{2+}$ -dependent  $\text{amU}_{\text{PS}}\text{U}$   $\{^1\text{H}\}^{31}\text{P}$  NMR spectra. Data are shown for the separated  $\text{R}_p$  (left) and  $\text{S}_p$  (right) diastereomers. Titration conditions are 15  $^\circ\text{C}$ , 5 mM Hepes pH 8.0, 100 mM NaCl.

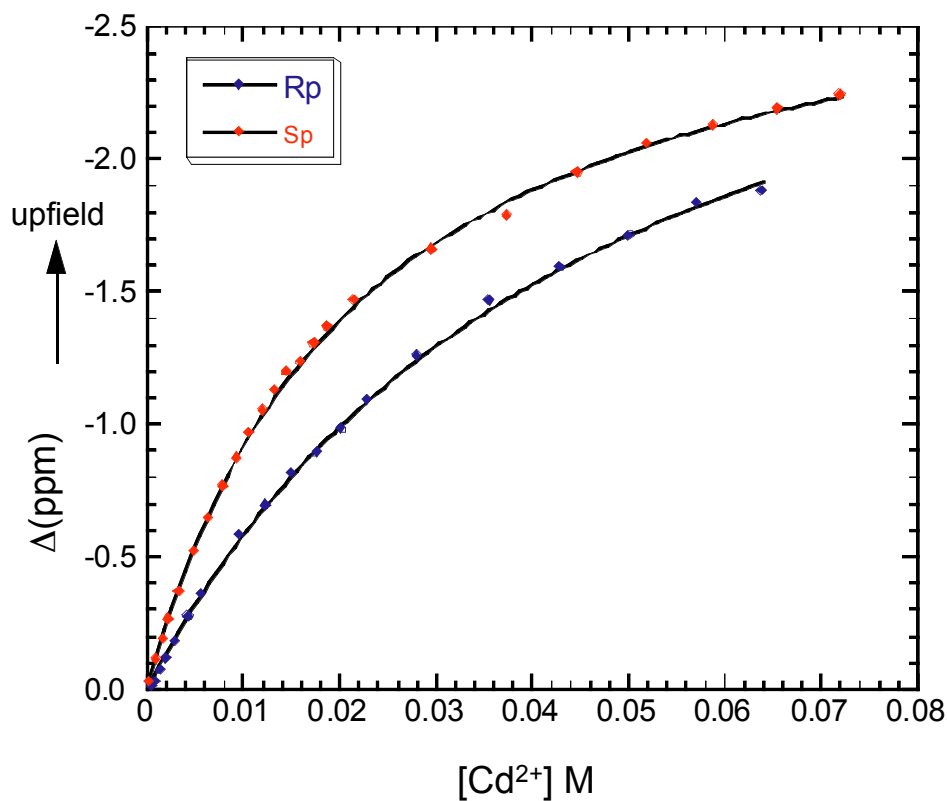

Figure S3. Fit of  $\text{Cd}^{2+}$ -dependent  $^{\text{am}}\text{U}_{\text{PS}}\text{U}$   $^{31}\text{P}$  NMR spectra.  $^{31}\text{P}$  NMR data from Figure S2 plotted as  $\Delta(\text{ppm}) = [\text{ppm}(+\text{Cd}^{2+}) - \text{ppm}(0 \text{ Cd}^{2+})]$  and fit to simple 1:1 binding isotherm model described in Equation 1 (Methods).  $\text{R}_\text{p}$  isomer data are in blue and  $\text{S}_\text{p}$  isomer data are shown in red.  $K_{\text{d,obs}}(^{\text{am}}\text{U}_{\text{PS}}\text{U}-\text{R}_\text{p}) = 46.9 \text{ mM}$ , and  $K_{\text{d,obs}}(^{\text{am}}\text{U}_{\text{PS}}\text{U}-\text{S}_\text{p}) = 21.6 \text{ mM}$  for titration conditions of  $15^\circ\text{C}$ ,  $5 \text{ mM}$  Hepes pH 8.0,  $100 \text{ mM}$  NaCl.

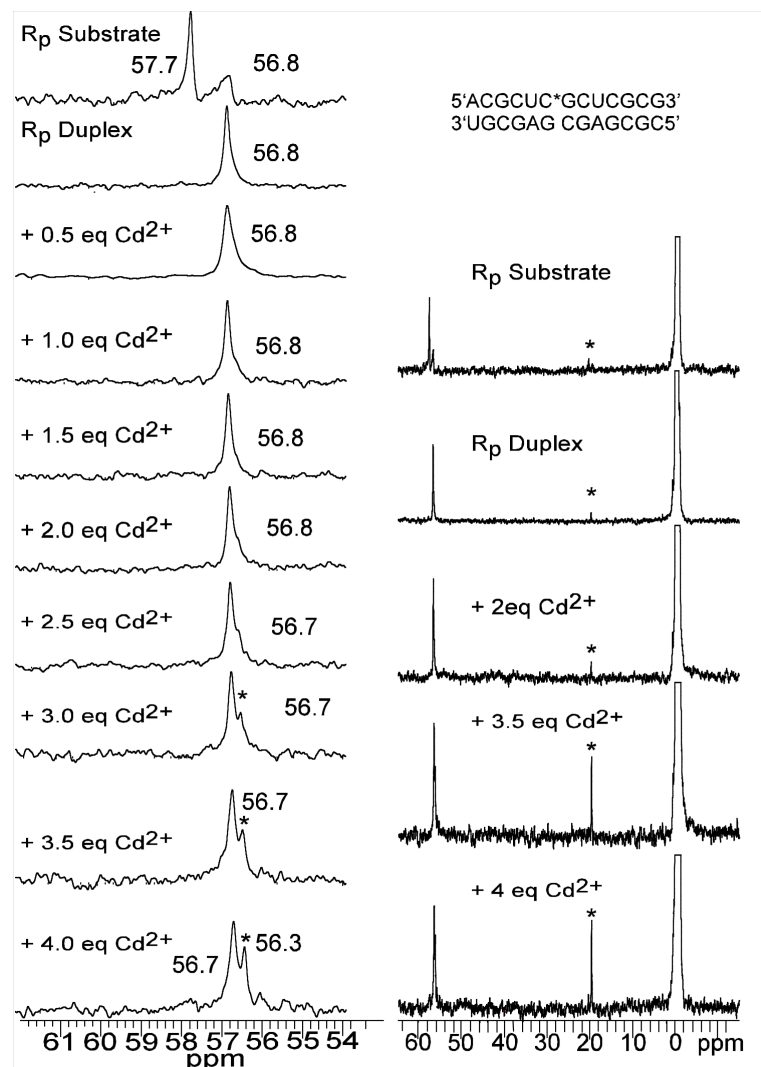

Figure S4a.  $^{31}\text{P}$  NMR spectra of the RNA duplex including the mHHRz substrate sequence (blue) with the  $R_p$  diastereomer of a 2'- $\text{NH}_2$ /PS substitution at the position indicated with the red C\*. Addition of up to 4 equivalents of  $\text{Cd}^{2+}$  results in a <1 ppm shift of the phosphorothioate peak, indicating weak interactions with this site. These samples showed some non-specific RNA cleavage, as indicated by the appearance of a cyclic phosphate peak at 20 ppm (marked with asterisk in full  $^{31}\text{P}$  spectrum shown at right) that correlates with appearance of a population with a slightly shifted phosphorothioate peak (asterisks on left side). Conditions: 15  $^\circ\text{C}$ , 5 mM HEPES pH 8.5, 100 mM NaCl.

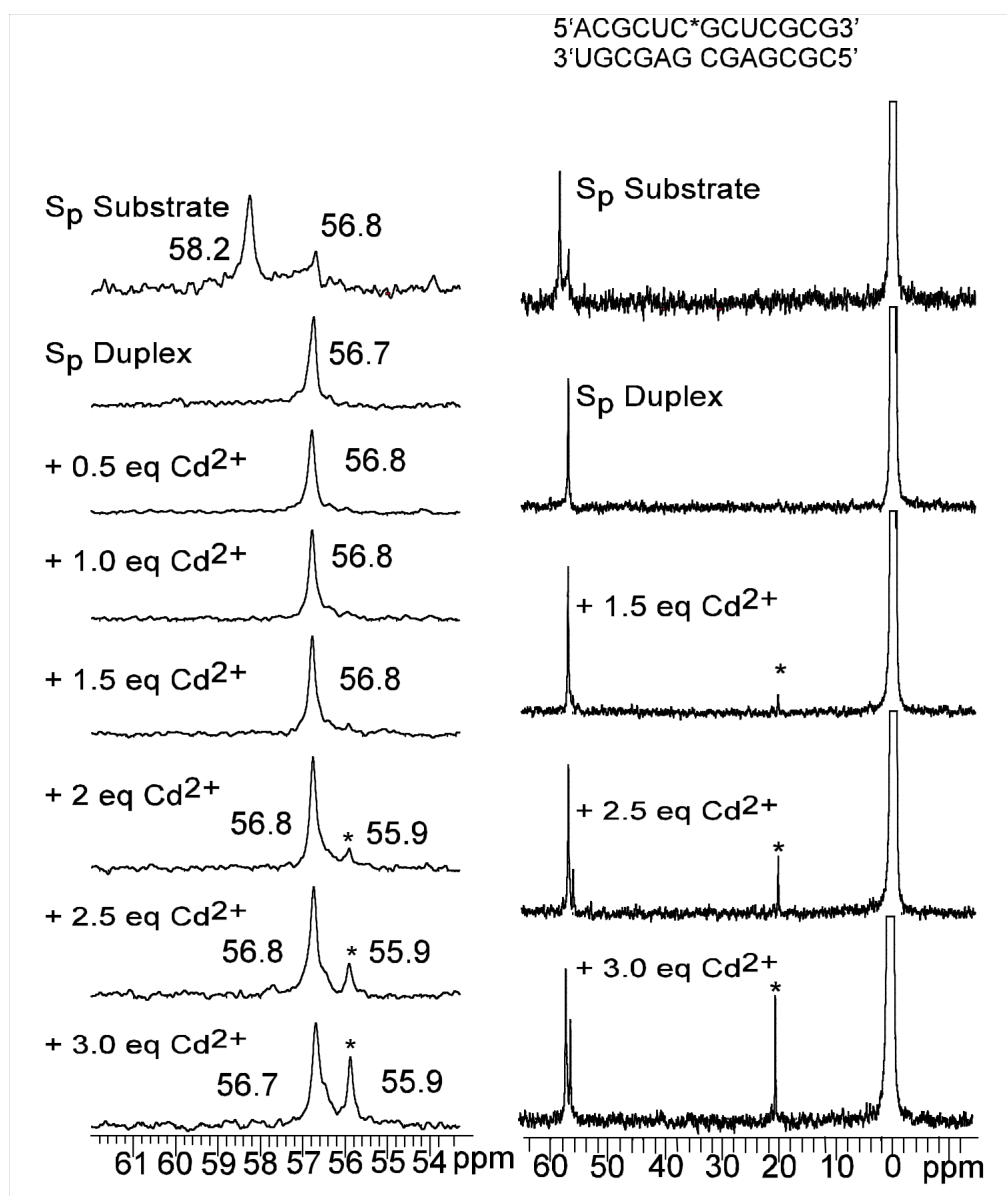

Figure S4b. <sup>31</sup>P NMR spectra of the RNA duplex including the trHHRz substrate sequence (blue) with the S<sub>p</sub> diastereomer of a 2'-NH<sub>2</sub>/PS substitution at the position indicated with the red C\*. Addition of up to 3 equivalents of Cd<sup>2+</sup> results in a <1 ppm shift of the phosphorothioate peak, indicating weak interactions with this site. These samples showed some non-specific RNA cleavage, as indicated by the appearance of a cyclic phosphate peak at 20 ppm (marked with asterisk in full <sup>31</sup>P spectrum shown at right) that correlates with appearance of a population with a slightly shifted phosphorothioate peak (asterisks on left side). Conditions: 15 °C, 5 mM Hepes pH 8.5, 100 mM NaCl.

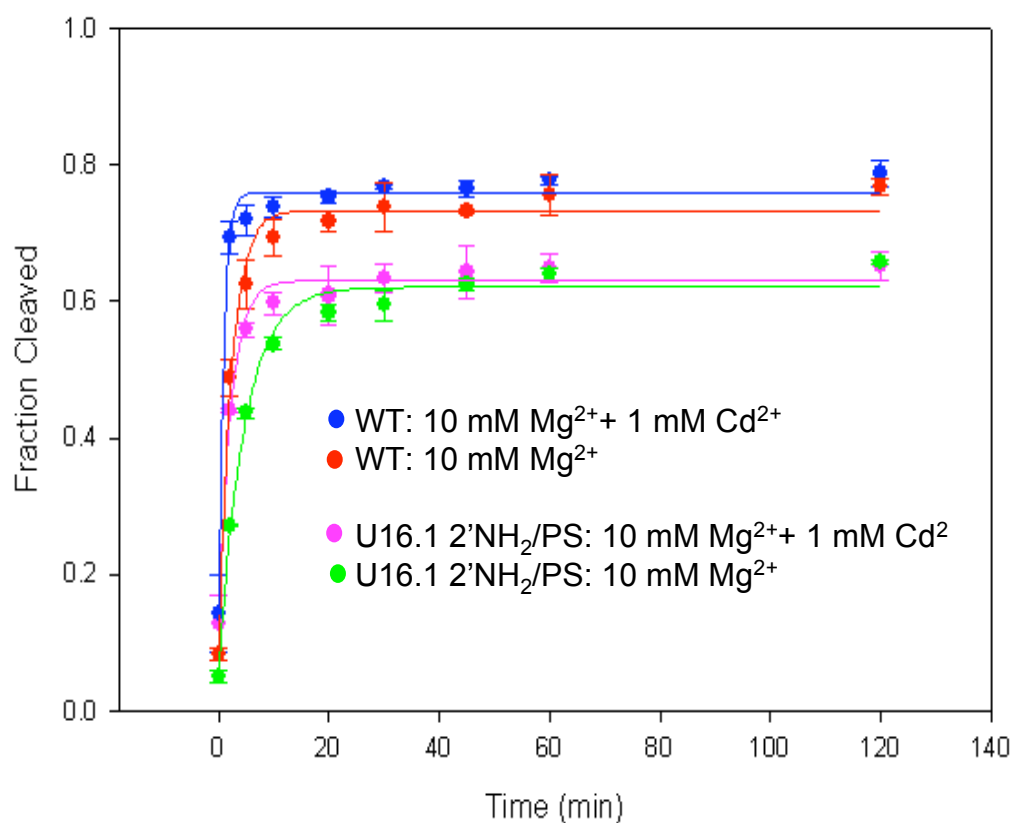

|                                                                           | $k_{\text{obs}}$ (min <sup>-1</sup> ) |
|---------------------------------------------------------------------------|---------------------------------------|
| <b>10 mM <math>\text{Mg}^{2+}</math></b>                                  |                                       |
| WT                                                                        | $0.43 \pm 0.05$                       |
| U16.1 2' NH <sub>2</sub> /PS                                              | $0.22 \pm 0.02$                       |
| <b>10 mM <math>\text{Mg}^{2+}</math>/1 mM <math>\text{Cd}^{2+}</math></b> |                                       |
| WT                                                                        | $1.1 \pm 0.18$                        |
| U16.1 2' NH <sub>2</sub> /PS                                              | $0.44 \pm 0.05$                       |

Figure S5. Activity of the mHHRz with a U16.1 2'-NH<sub>2</sub>/PS substitution in comparison with WT. Kinetics were measured in single-turnover conditions (10:1 enzyme:substrate) in 25 mM MOPS pH 7.0, 10 mM NaCl, and the indicated divalent metal ion concentrations. Data are plotted as (fraction cleaved) vs. time, and fit to a single-exponential rate  $k_{\text{obs}}$  as described in Methods.

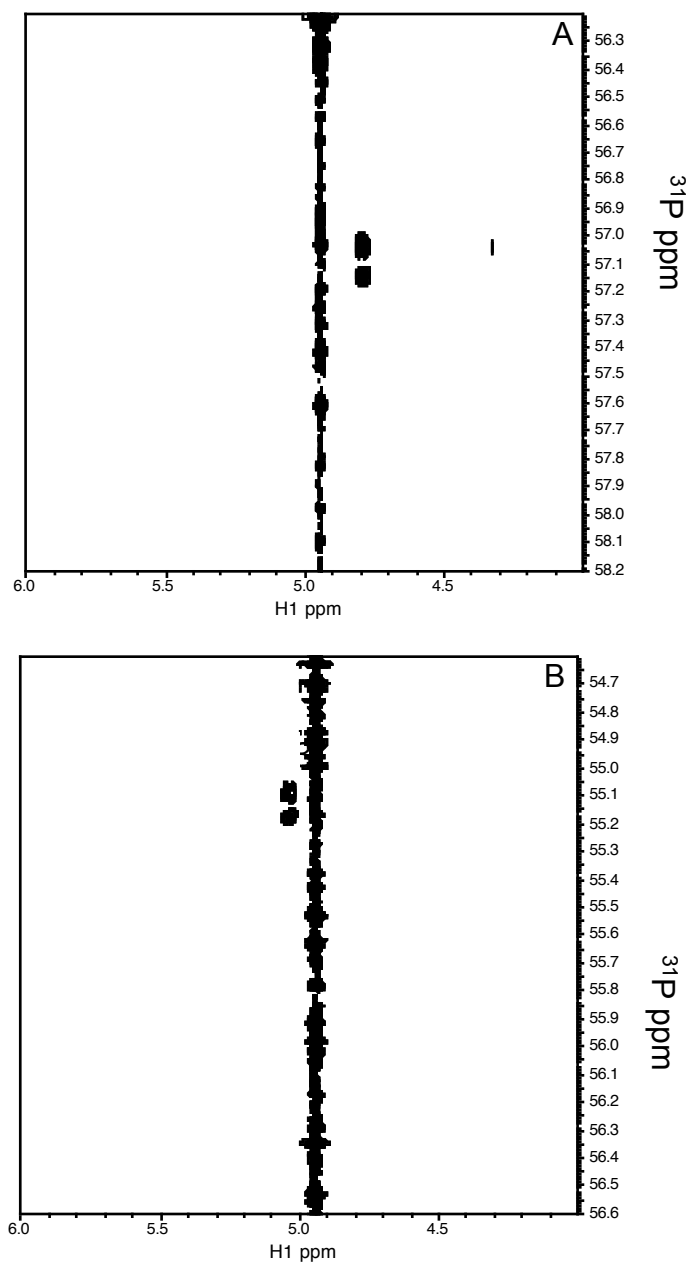

Figure S6a.  $^1\text{H}$ - $^{31}\text{P}$  COSY spectra of  $^{\text{am}}\text{U}_{\text{PS}}\text{U R}_p$  diastereomer in absence (A) and presence (B) of  $40\text{ mM CdCl}_2$ . A  $^1\text{H}$ - $^{31}\text{P}$  crosspeak appears between between the H3' of the 2'-NH<sub>2</sub> ribose and the phosphorothioate. Sample conditions:  $10\text{ mM}$  phosphate/D<sub>2</sub>O buffer pH 7.0 (corrected),  $100\text{ mM NaCl}$ ,  $10^\circ\text{C}$ .



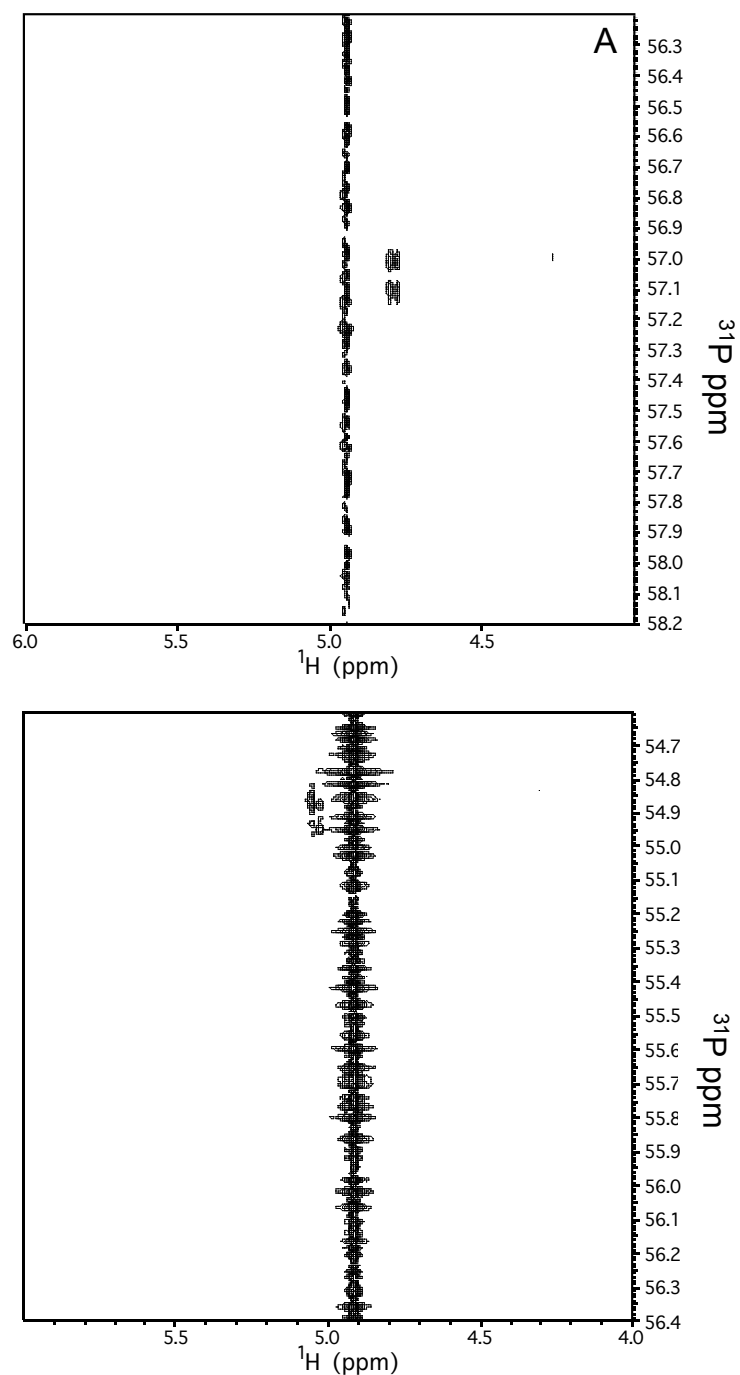

Figure S6b.  $^1\text{H}$ - $^{31}\text{P}$  COSY spectra of  $^{\text{am}}\text{U}_{\text{PS}}\text{U S}_{\text{p}}$  diastereomer in absence (A) and presence (B) of 40 mM  $\text{CdCl}_2$ . A  $^1\text{H}$ - $^{31}\text{P}$  crosspeak appears between between the H3' of the 2'- $\text{NH}_2$  ribose and the phosphorothioate. Sample conditions: 10 mM phosphate/ $\text{D}_2\text{O}$  buffer pH 7.0 (corrected), 100 mM NaCl,  $10^\circ\text{C}$ .

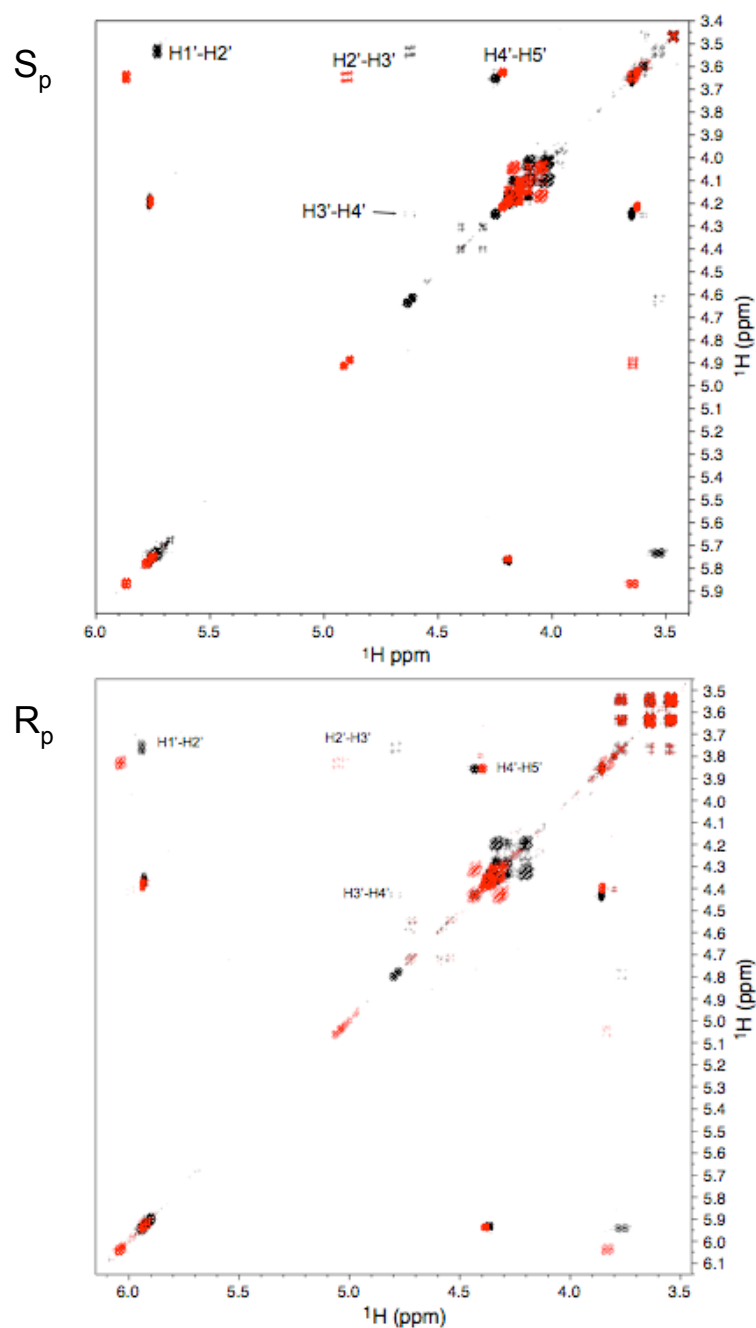

Fig. S7. DQF-COSY spectra of  $amU_{PS}U$  diastereomers in presence and absence of  $Cd^{2+}$ . Data are shown for  $S_p$  (upper) and  $R_p$  (lower) diastereomer in the absence (black) and presence (red) of 40 mM  $CdCl_2$ . Conditions: 10 mM sodium cacodylate/ $D_2O$ , pH 7.4 (corrected), 100 mM NaCl,  $10^0C$ .
